# Supplementary material
Source: MDPI journal article supplement (https://www.mdpi.com/2072-4292/14/16/4101)
Supplement: s1 [file s1]

# Supplementary material

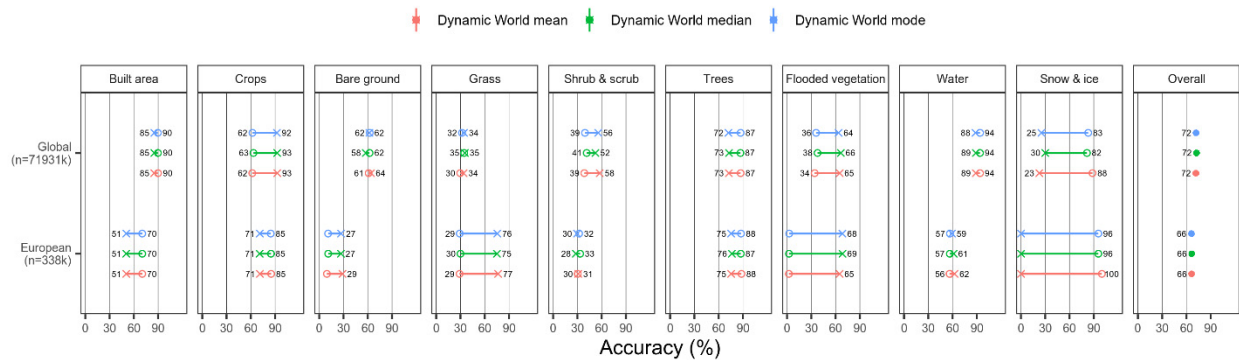

Figure S1. Accuracy of three types of annual compositing of Dynamic World land cover maps at the global and regional extent. Compositing methods include a model reducer on the label band, and a mean and median reducer on the class probabilities, followed by a highest probability vote classification. Global validation is based on hand-annotated image tiles with a minimum mapping unit of 50 × 50 m. European validation is based on point-based ground truth data from the LUCAS survey. Accuracy is expressed as precision/user's, recall/producer's and overall accuracy based on a confusion matrix with sample sizes indicated in thousands (K) in parenthesis on the y-axis.
